# Supplementary material for: Impact of Newly Diagnosed Cancer on Bleeding Events in Patients with Atrial Fibrillation Treated with Direct Oral Anticoagulants
Source: Springer Nature journal article supplement (doi:10.1007/s40256-024-00676-y), 2024-09-06
Supplement: MOESM1 [file 40256_2024_676_MOESM1_ESM.docx]

**SUPPLEMENTARY MATERIALS**

**Impact of newly diagnosed cancer on bleeding events in patients with atrial fibrillation treated with direct oral anticoagulants.**

**Short title:** Bleeding risk in atrial fibrillation**.**

**Journal: American Journal of Cardiovascular Drugs.**

**Authors**: Francesco Angeli, MD,a,b* Luca Bergamaschi, MD, a,b* Matteo Armillotta, MD,a,b Angelo Sansonetti, MD,a,b Andrea Stefanizzi, MD,a,b Lisa Canton, MD,a,b Francesca Bodega, MD,a,b Nicole Suma, MD,a,b Sara Amicone, MD,a,b Damiano Fedele, MD,a,b  Davide Bertolini, MD,a,b  Andrea Impellizzeri, MD,a,bFrancesco Pio Tattilo, MD,a,b Daniele Cavallo, MD, a,b Lorenzo Bartoli, MD,a,b Ornella Di Iuorio, MD, a,b Khrystyna Ryabenko, MD,a,b Marcello Casuso Alvarez, MD, a,b Virginia Marinelli, MD,a,b Claudio Asta, MD, a,b Mariachiara Ciarlantini, MD,a,b Giuseppe Pastore, MD,a,b Andrea Rinaldi, MD, PhD, a,b Daniela Paola Pomata, MD,c Ilaria Caldarera, MD, a,b, and Carmine Pizzi a,b MD.

**Affiliations**:

a) Cardiology Unit, Cardiac Thoracic and Vascular Department, IRCCS Azienda

Ospedaliero-Universitaria di Bologna, Bologna, Italy;

b) Department of Medical and Surgical Sciences- DIMEC, University of Bologna, Via

Giuseppe Massarenti 9, 40138, Bologna, Italy;

c) Division of Emergency Medicine, IRCCS Azienda Ospedaliero-Universitaria di Bologna, Bologna, Italy.

* The first two authors contributed equally to this work

**Competing interests and Funding**: None to declare.

**Corresponding author:**

Carmine Pizzi, MD, FESC

Cardiology Unit, Cardiac Thoracic and Vascular Department, IRCCS Azienda Ospedaliera-

Universitaria di Bologna. Department of Medical and Surgical Sciences – DIMEC

Alma Mater Studiorum, University of Bologna, Italy

Tel. +39 051 2144933

E-mail: carmine.pizzi@unibo.it

**Population according to Cancer at Baseline**

Out of 1170, cancer at baseline (CB) cohort was constituted by 81 (6.9%) patients, while the other patients weren’t affected by cancer at enrollment (no-CB population 1089, 93.1%). The most frequent cancer location was upper and lower gastrointestinal system (6.3% and 22.2%, respectively, **Supplementary Table 1**).

CB patients were less frequently female (43.2% vs 52.4%, p=0.009), but no other differences were observed regarding age, cardiovascular risk factors or other comorbidities (**Supplementary Table 2**).

A similar incidence of major and non-major bleeding was found between CB and no-CB cohorts during follow up, despite lower basal level of hemoglobin (11.4 vs 12.3, p= 0.02) and higher HAS-BLED (p= 0.048) and ATRIA (p< 0.01) in CB population. Ischemic events, MACEs and ACS rates between CB e no-CB populations were similar (**Supplementary Table 4**).

**SUPPLEMENTARY TABLES**

**Supplementary Table 1.** Demographic characteristics, type of DOAC, dose reduction criteria and location of cancer in patients with CFU and CB.

|  | CFU  (N = 81) | CB  (N = 81) |
| --- | --- | --- |
| Demographic characteristic |  |  |
| Age, years  Female Sex, n (%) | 75 [69-83]  43 (53.1) | 78 [72-84]  35 (43.2) |
| Type of DOAC |  |  |
| *Apixaban 5 mg*  *Apixaban 2.5 mg*  *Rivaroxaban 20 mg*  *Rivaroxaban 15 mg*  *Edoxaban 60 mg*  *Edoxaban 30 mg*  *Dabigatran 150 mg*  *Dabigatran 110 mg* | 30 (37)  2 (2.5)  16 (19.7)  10 (12.3)  5 (6.3)  7 (8.6)  10 (12.3)  1 (1.3) | 22 (27.2)  3 (3.7)  18 (22.2)  6 (7.4)  10 (12.3)  13 (16)  5 (6.3)  4 (4.9) |
| Reduced dose DOAC, n (%)  Dose reduction criteria, n (%) | 20 (24.7) | 25 (30.8) |
| *eGFR <50 ml/min*  *Weight <60 kg*  *Age >80 years*  *and creatinine >1.5 mg/dL*  *Age >80 years*  *and weight <60 kg*  *High bleeding risk*  *Age>80 years* | 15 (75)  2 (10)  1 (5)  1 (5)  1 (5)  0 (0) | 12 (48)  6 (24)  1 (4)  2 (8)  1 (4)  3 (12) |
| Cancer site |  |  |
| Upper GI  Lower GI  Lung  Breast  Melanoma  Urinary tract  Brain  Leukaemia/lymphoma  Prostate  Other | 4 (4.9)  17 (20.9)  8 (9.8)  5 (6.3)  7 (8.6)  8 (9.8)  2 (2.5)  9 (11.1)  10 (12.3)  11 (13.6) | 5 (6.3)  18 (22.2)  9 (11.1)  7 (8.6)  3 (3.7)  9 (11.1)  1 (1.3)  13 (16)  8 (9.8)  8 (9.8) |

***Abbreviations:*** *CB: Cancer at baseline; CFU: Cancer at follow-up; DOAC: Direct Oral Anticoagulant; eGFR: estimated Glomerular Filtration Rate; GI: Gastro-Intestine*

**Supplementary Table 2.** Baseline population characteristics in total population, CB and no-CB patients.

|  | Total    (N = 1170) | No-CB    (N = 1089) | CB    (N = 81) | P value |
| --- | --- | --- | --- | --- |
| Age, years | 77 [69-83] | 77 [68-83] | 78 [72-84] | 0.257 |
| Female Sex, n (%) | 606 (51.8) | 571 (52.4) | 35 (43.2) | 0.009 |
| BMI, Kg/m2 | 26 [23.4-29.3] | 26 [23.1-29.2] | 26 [22.9-28.6] | 0.357 |
|  |  |  |  |  |
| *Cardiovascular risk factor* |  |  |  |  |
| Smoking, n (%) | 434 (37.1) | 400 (36.7) | 34 (41.9) | 0.687 |
| Dyslipidemia, n (%) | 563 (48.2) | 527 (48.4) | 36 (44.4) | 0.284 |
| Type-2 diabetes, n (%) | 157 (13.4) | 151 (13.9) | 6 (7.4) | 0.890 |
| Hypertension, n (%) | 901 (77.1) | 842 (77.3) | 59 (73.2) | 0.267 |
|  |  |  |  |  |
| *Past medical history* |  |  |  |  |
| PAD, n (%)  Prior stroke, n (%) | 50 (4.3)  124 (10.6) | 44 (4.4)  115 (10.6) | 6 (7.4)  9 (11.1) | 0.300  0.76 |
| *Basal Laboratory data* |  |  |  |  |
| Hb, mg/dL | 13.64 ± 1.84 | 13.7 ±1.3 | 12.9 ±1.5 | 0.002 |
| PLTs, count x 10^9 per L | 228 [190-275] | 228 [190-276] | 227 [188-267] | 0.579 |
| WBC, N/μl | 9.5±7.2 | 9.41 ±5.7 | 9.8 ±7.5 | 0.061 |
| Adm. Creatinine, mg/dL | 0.96 ± 0.3 | 0.96 ±0.3 | 01.0 ±0.4 | 0.384 |
| CRP, mg/dL | 0.44 [0.17-1.75] | 0.31 [0.17-1.76] | 0.78 [0.21-4.16] | 0.07 |
| *Basal AF Risk scores* |  |  |  |  |
| CHA2DS2VASc score | 4 [3-5] | 4 [3-5] | 4 [3-5] | 0.493 |
| ATRIA stroke score | 6 [4-7] | 4 [4-7] | 6 [5-7] | 0.700 |
| HASBLED score | 3 [2-4] | 3 [2-4] | 4 [3-5] | 0.043 |
| ATRIAbleed score | 3 [1-4] | 3 [1-3] | 3 [2-6] | 0.001 |
| ORBIT score | 2 [1-3] | 2 [1-3] | 2 [2-4] | 0.001 |
| TIMIAF score | 5 [3-6] | 5 [3-6] | 5 [4-6] | 0.038 |
|  |  |  |  |  |

Continuous variables are presented as median [IQR] or mean ± SD according to values distribution, while categorical ones as n (%).

***Abbreviations****: CFU = Cancer at Follow-Up; BMI=Body mass Index; PAD=peripherical artery disease; Hb= Hemoglobin; PLTs=platelets; WBC=white blood cell; CRP= C Reactive Protein.*

**Supplementary Table 3.** Distribution of different sites of bleeding in total population, in CFU and no-CFU cohorts

| Bleeding site, n (%) | Total Population | No-CFU | CFU |
| --- | --- | --- | --- |
|  |  |  |  |
| Upper GI | 31 (12.5) | 26 (12.4) | 5 (12.8) |
| Lower GI | 48 (19.3) | 31 (14.8) | 17 (43.5) |
| Urinary tract | 37 (14.9) | 29 (13.8) | 8 (20.5) |
| Gynaecologic tract | 8 (3.2) | 4 (1.9) | 4 (10.2) |
| Skin | 12 (4.8) | 12 (5.7) | 0 (0.0) |
| ENT | 61 (24.5) | 60 (28.7) | 1 (2.5) |
| Neurologic | 22 (8.8) | 21 (10) | 1 (2.5) |
| Others | 18 (7.2) | 17 (8.1) | 1 (2.5) |
| More sites | 11 (4.4) | 9 (4.3) | 2 (5.1) |

***Abbreviations****: FU: Cancer ad Follow up; ENT: ears, nose and throat; GI: Gastro-Intestine*

**Supplementary Table 4.** Ischemic and Hemorrhagic events occurred at follow-up according to CB presence.

|  | **Total**    **(N = 1170)** | **No CB**    **(N = 1089)** | **CB**    **(N = 81)** | **P value** |
| --- | --- | --- | --- | --- |
| **CV deaths, n (%)** | 48 (4.1) | 44 (4.0) | 4 (4.9) | 0.78 |
| **ACS n (%)** | 32 (2.7) | 29 (2.6) | 3 (3.7) | 0.07 |
| **Bleedings, n (%)** | 248 (21.2) | 229 (21.0) | 19 (23.8.) | 0.52 |
| **Major bleeding, n (%)** | 63 (5.4) | 57 (5.2) | 6 (7.4) | 0.43 |
| **Stroke/TIA events, n (%)** | 82 (7) | 76 (7) | 6 (7.4) | 0.89 |
| **MACE, n (%)** | 162 (13.8) | 152 (14.0) | 10 (12.3) | 0.62 |

***Abbreviations****: CB = Cancer at Baseline; CV: Cardiovascular; ACS= acute coronary syndrome; MACE= Major adverse cardiovascular events; TIA = Transient ischemic attack*

**Supplementary Table 5.** Multivariable analysis – Predictors of ischemic events (TIA or stroke)

| Variables | HR | Standard Error | 95% CI | p-value |
| --- | --- | --- | --- | --- |
| CFU | 1.67 | 0.81 | 0.41-2.62 | 0.08 |
| CB | 1.04 | 0.49 | 0.64 – 4.35 | 0.28 |
| Age | 1.02 | 0.02 | 0.98-1.01 | 0.25 |
| CHA2DS2-VASc | 1.43 | 0.11 | 1.21 - 1.68 | <0.001 |

***Abbreviation****s: CB: Cancer at baseline; CFU: Cancer at follow up; CI: Confident Interval; HR: Hazard Ratio; TIA = Transient ischemic attack.*

**Supplementary Figure Legend**

**Online Fig. 1** Study Flow chart

**Online Fig. 2** Distribution of different types of cancer diagnosed during follow up (CFU).

**Online Fig. 1** Study Flow chart


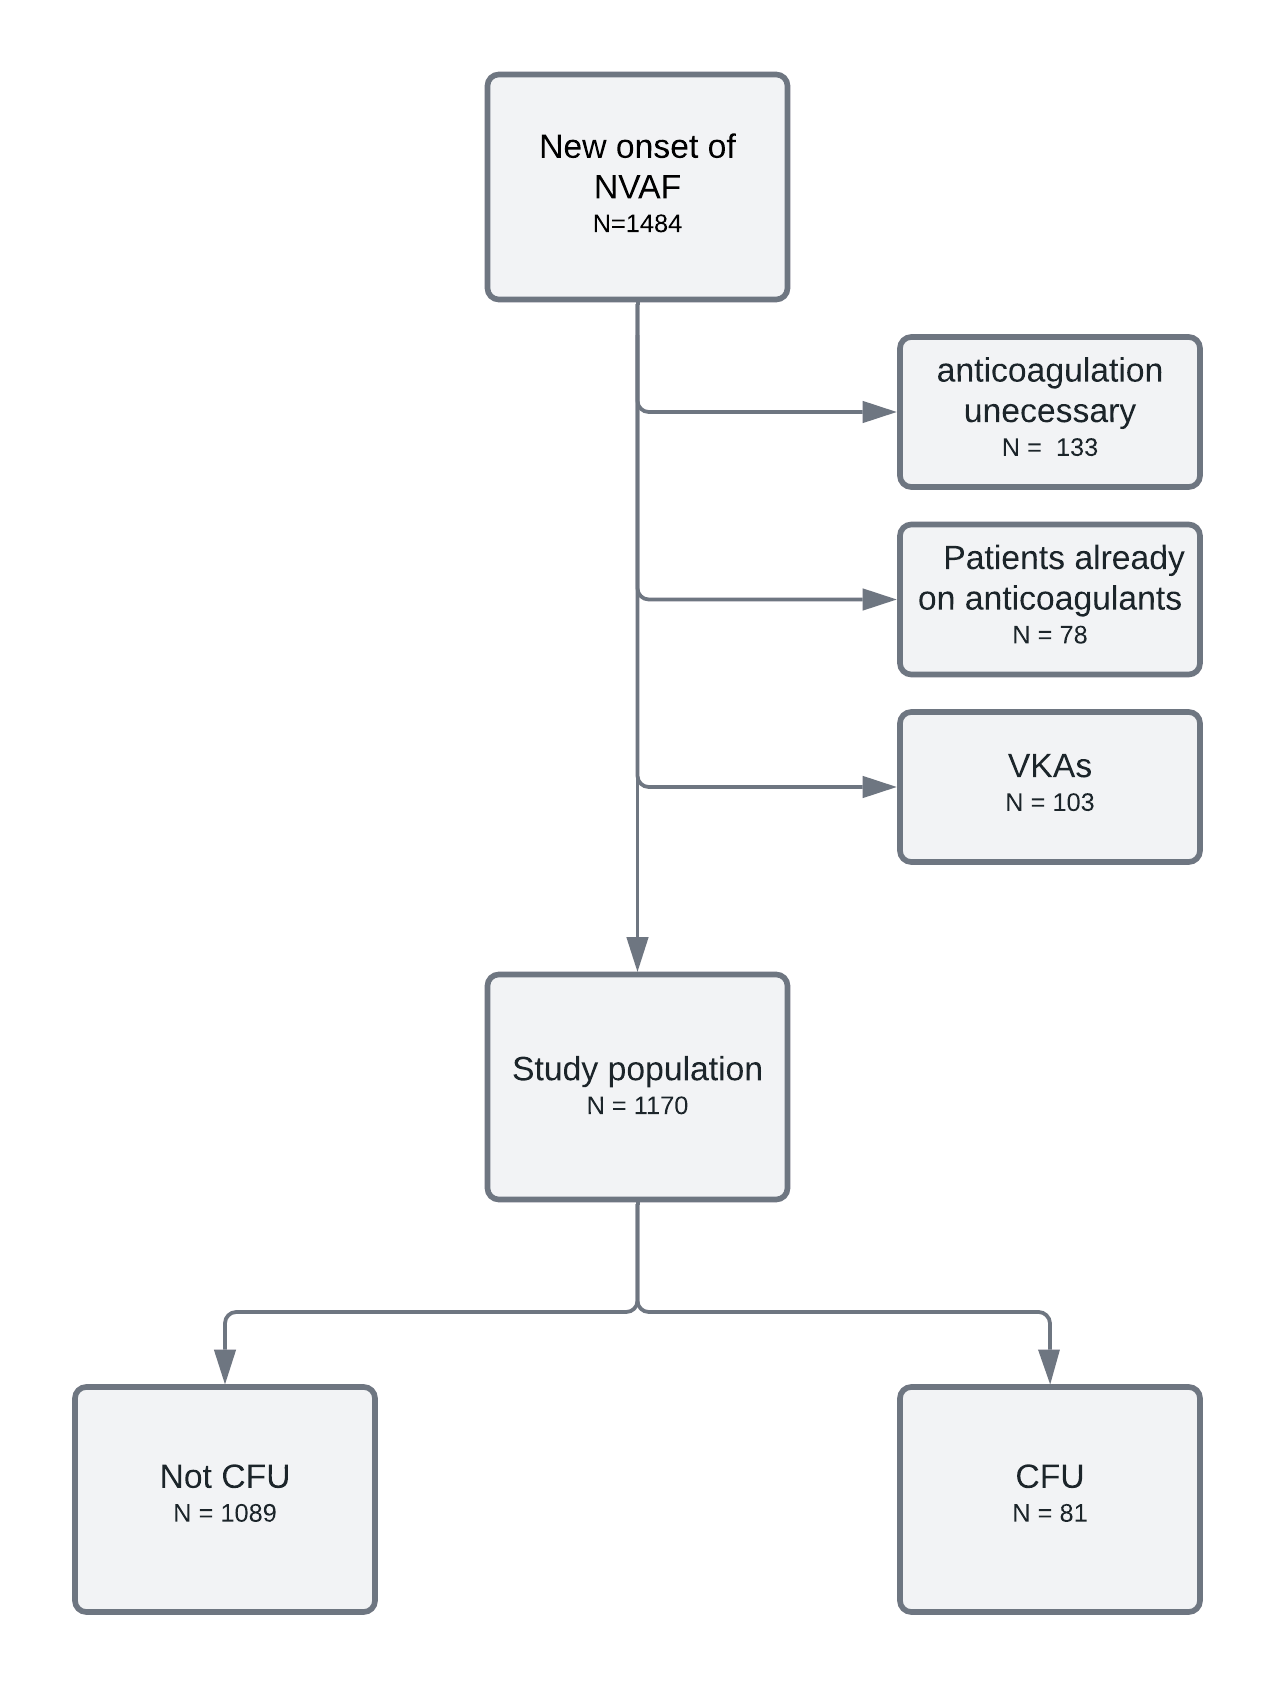


CFU: Cancer at follow up; NVAF: Non-valvular atrial fibrillation; VKA: Vitamin K antagonists.

**Online Fig. 2** Distribution of different types of cancer diagnosed during follow up (CFU).


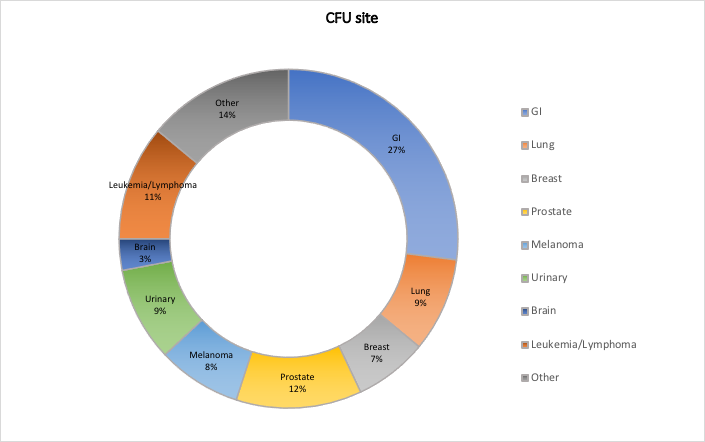


GI: Gastro-Intestine; CFU: Cancer at follow up
